# Supplementary figures and images for: Comparative Analysis of Chlamydia psittaci Genomes Reveals the Recent Emergence of a Pathogenic Lineage with a Broad Host Range
Source: PubMed Central journal article supplement — mBio. 2013 Mar 26;4(2):e00604-12. doi: 10.1128/mBio.00604-12 (PMC3622922; doi:10.1128/mbio.00604-12), 2013-03-26

# A. Phylogeny of GuaA

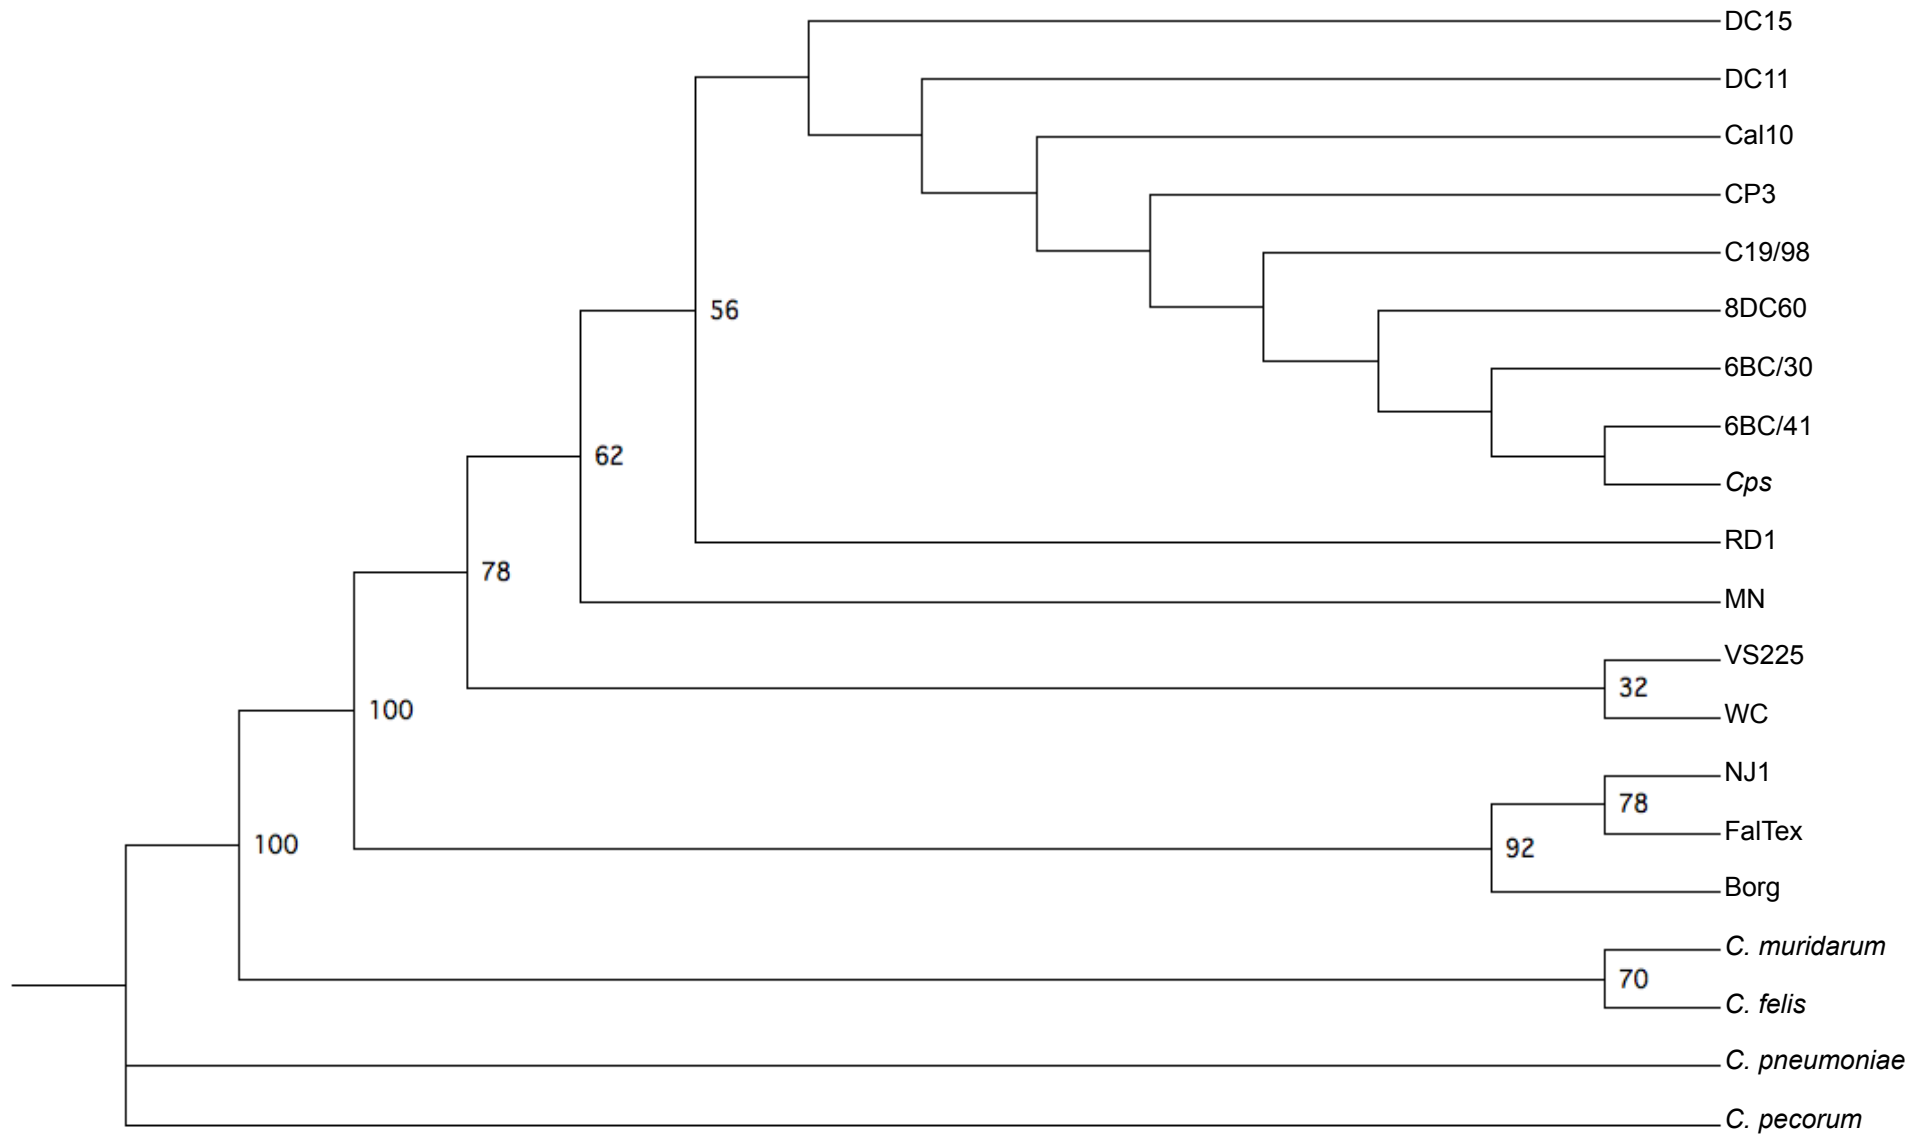

## B. Phylogeny of GuaB

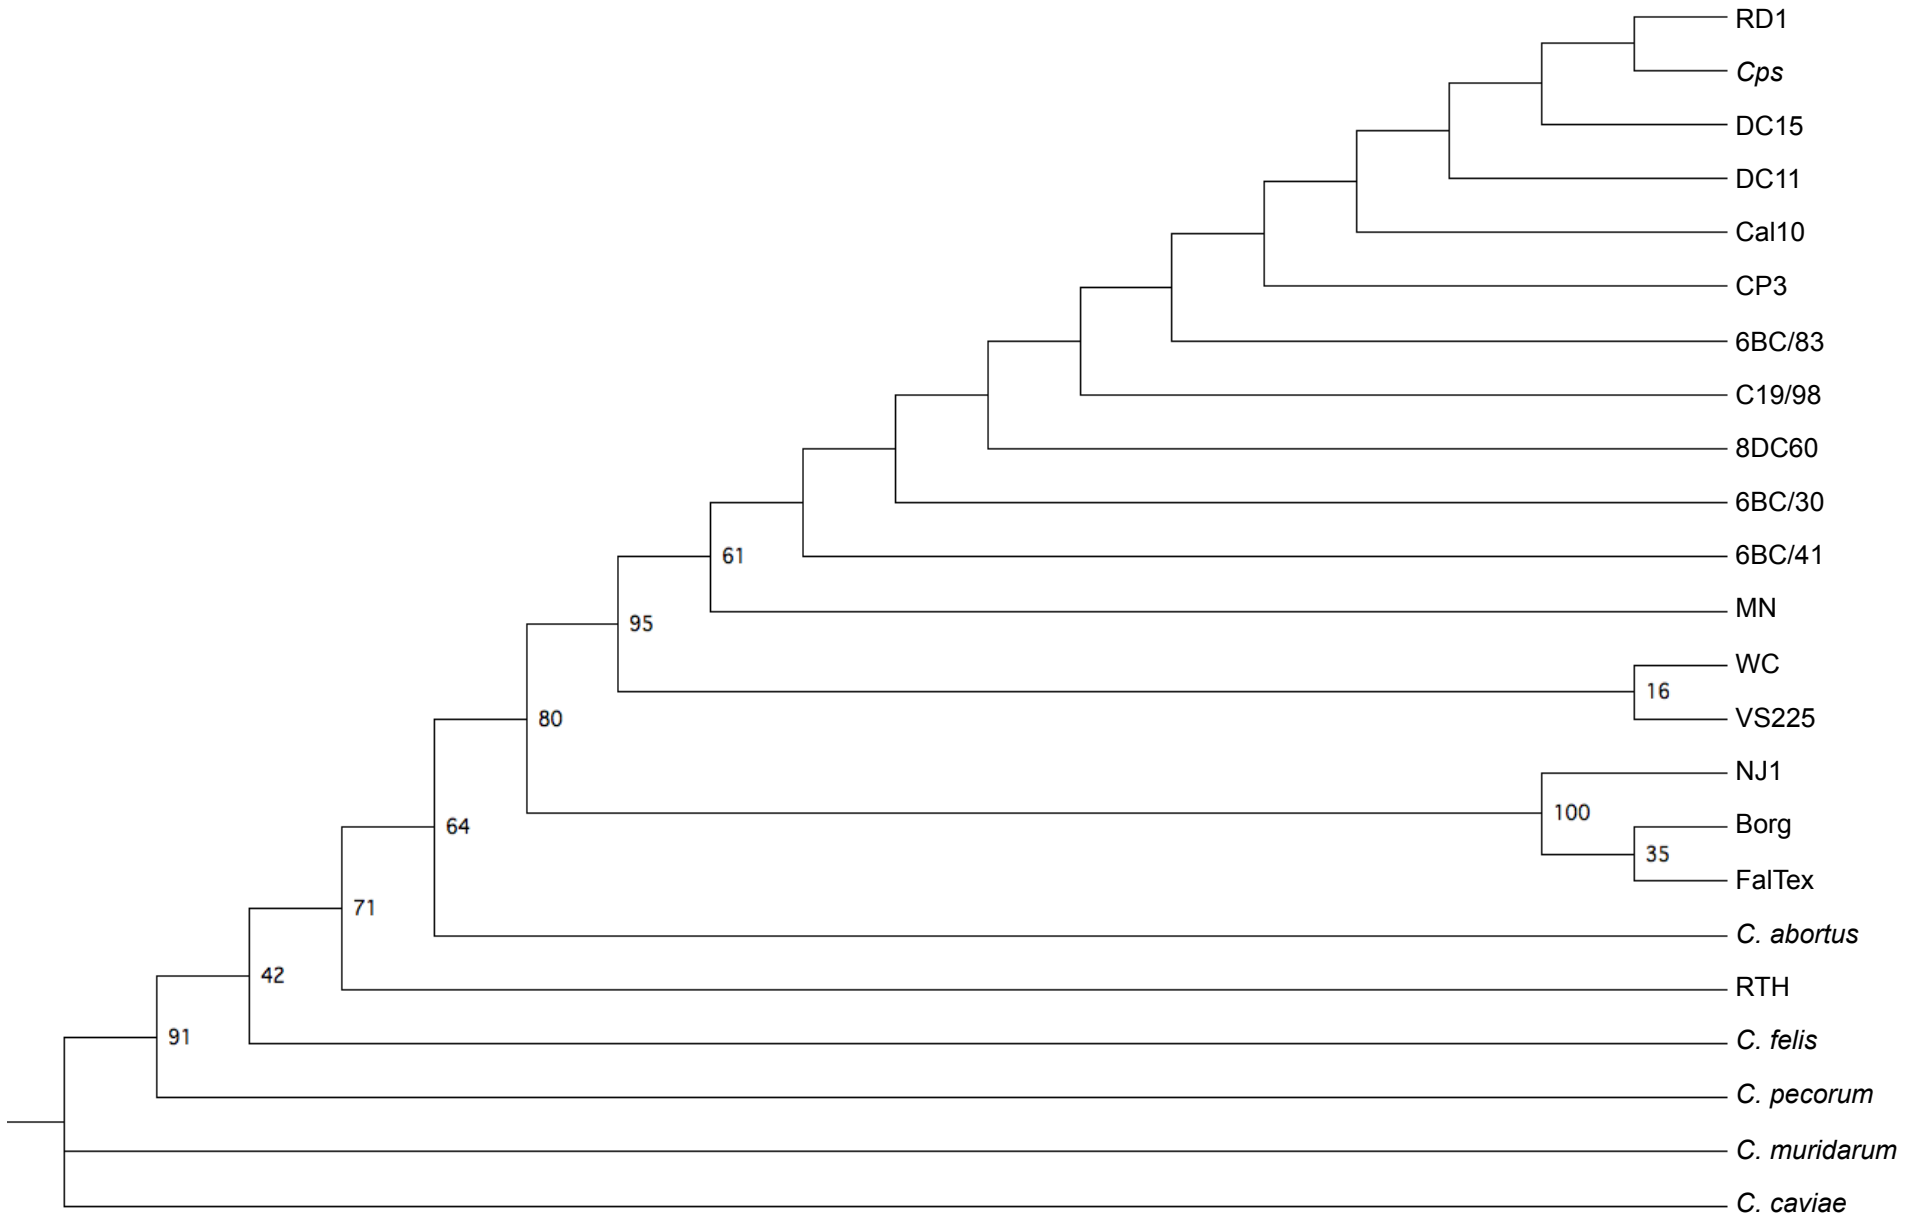

### C. Phylogeny of Add

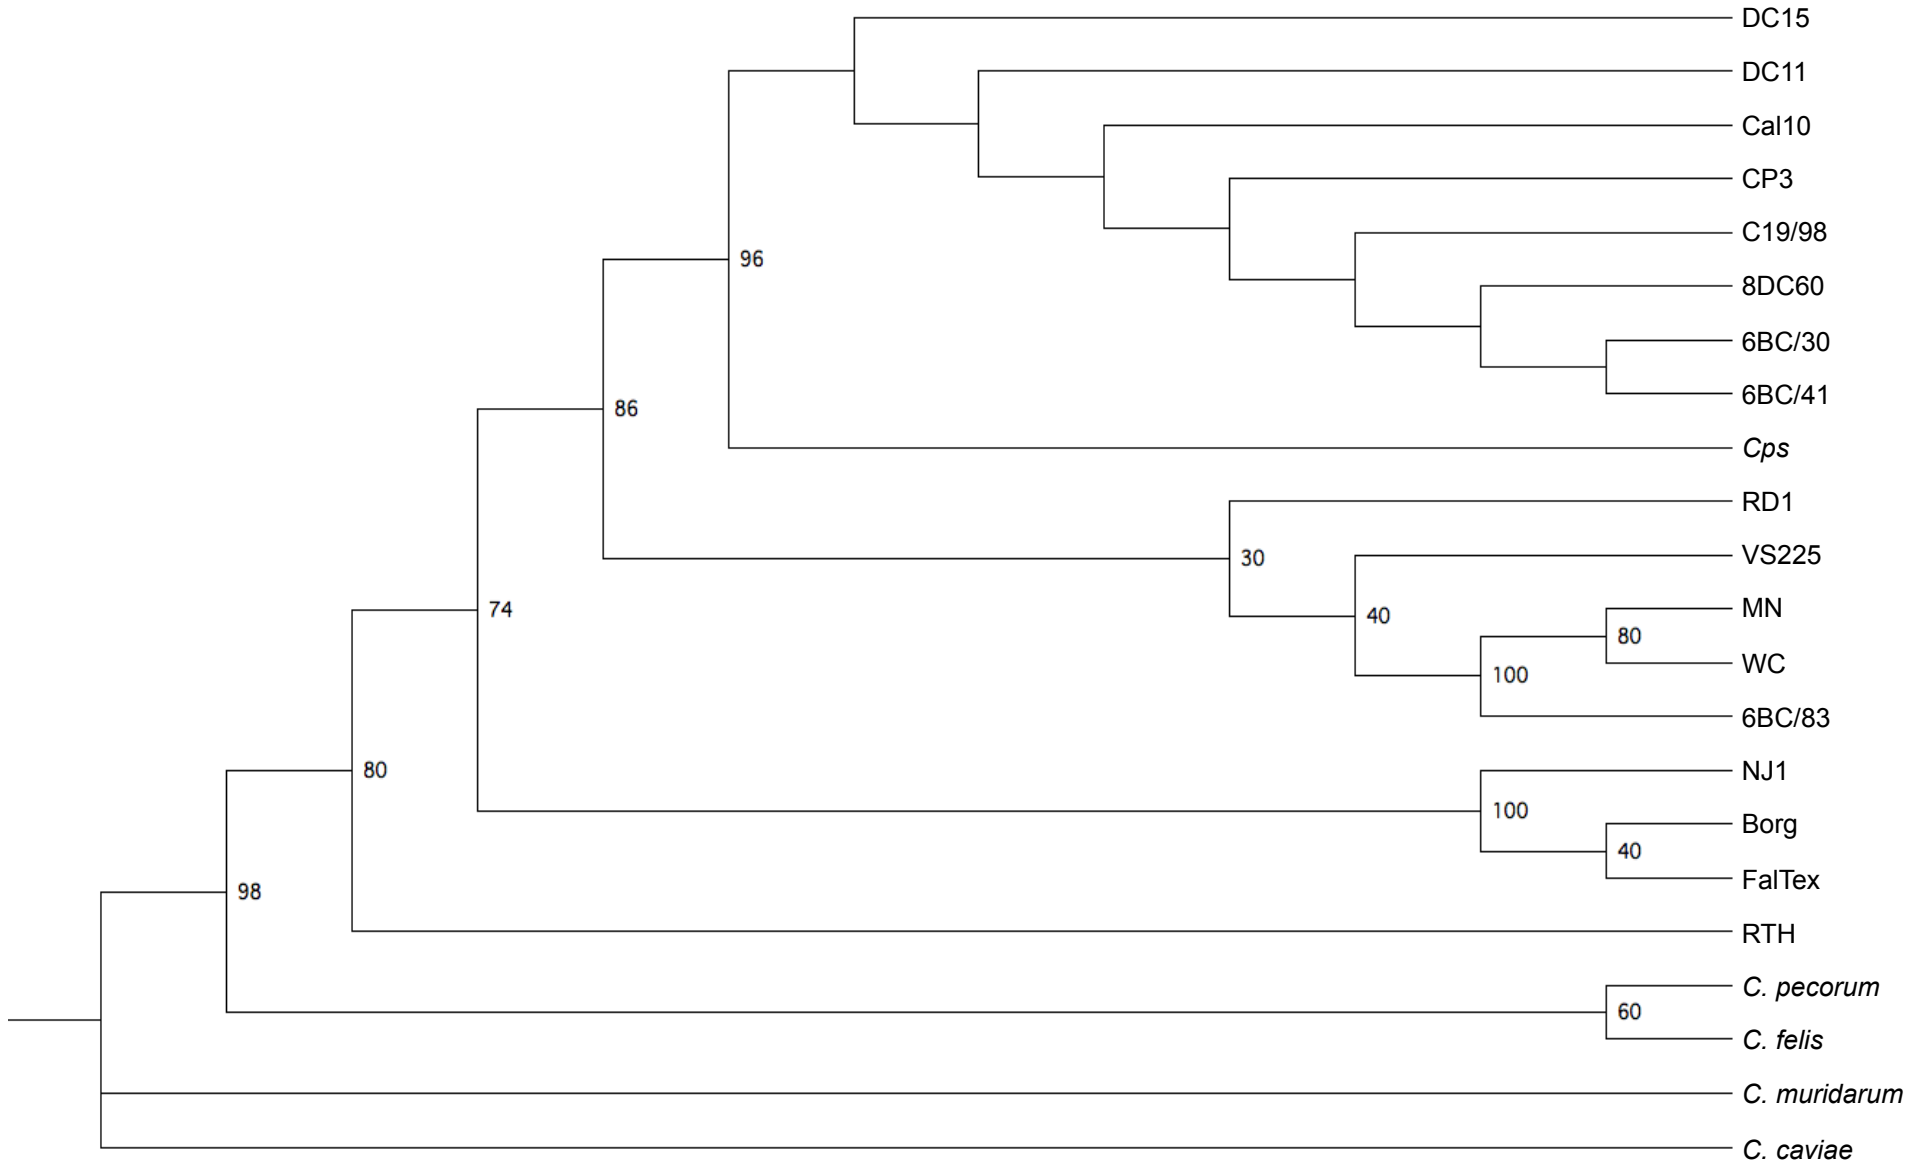

## D. Phylogeny of RecA

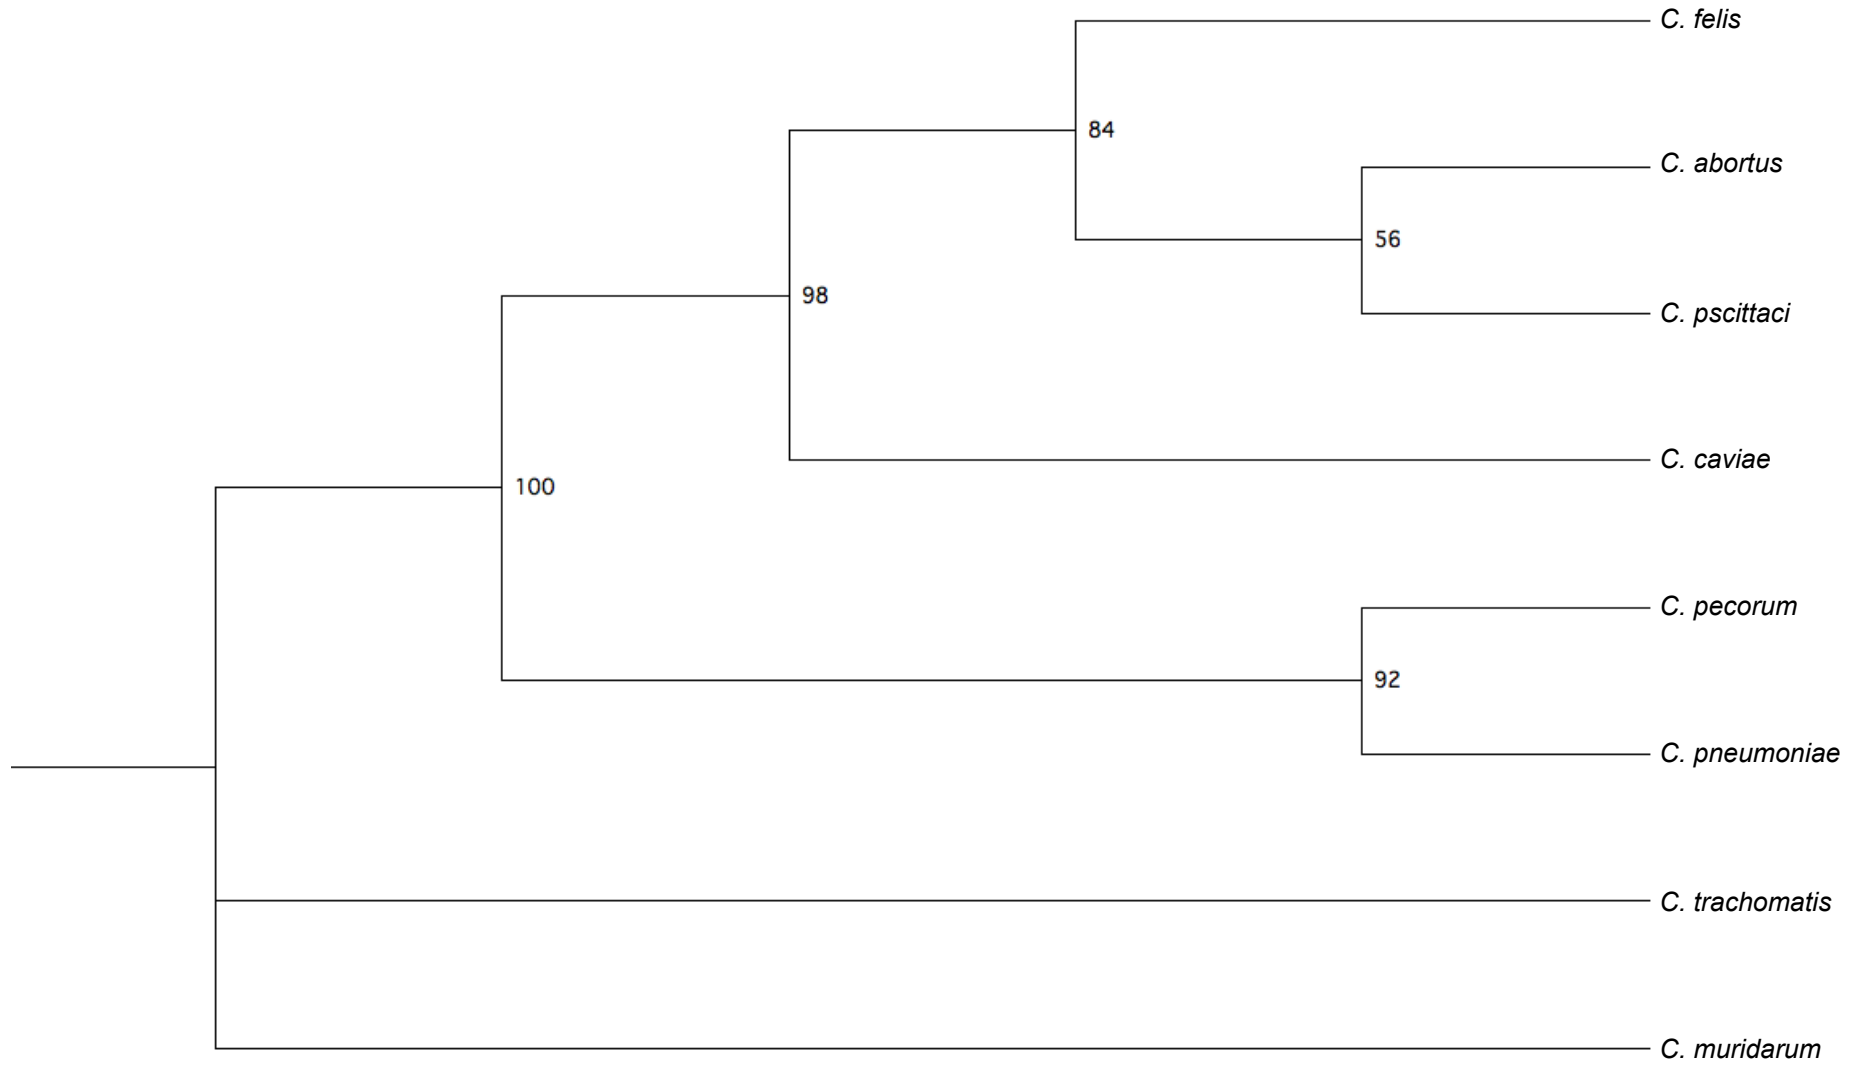

Supplement: mbo002131476sf04.pdf [file mbo002131476sf04.pdf]
